# Supplementary material
Source: PubMed Central journal article supplement (PMC7836843)
Supplement: mmc1.pdf [file mmc1.pdf]

# THE LANCET

## Supplementary appendix

This appendix formed part of the original submission. We post it as supplied by the authors.

Supplement to: Sayampanathan AA, Heng CS, Phua HP, Pang J, Teoh YL, Lee VJ. Infectivity of asymptomatic versus symptomatic COVID-19. *Lancet* 2020; published online Dec 18. [http://dx.doi.org/10.1016/S0140-6736\(20\)32651-9](http://dx.doi.org/10.1016/S0140-6736(20)32651-9).

| Serology and Symptom Status of Index | No. of index cases (% of index cases) | No. of quarantined community contacts | No. and proportion of quarantined community contacts identified as COVID-19 cases (%) |
|--------------------------------------|---------------------------------------|---------------------------------------|---------------------------------------------------------------------------------------|
| <b>(1) Seronegative</b>              | <b>232 (36.9)</b>                     | <b>1387</b>                           | <b>43 (3.10)</b>                                                                      |
| Asymptomatic                         | 196 (31.2)                            | 836                                   | 14 (1.67)                                                                             |
| Symptomatic                          | 36 (5.7)                              | 551                                   | 29 (5.26)                                                                             |
| <b>(2) Seropositive</b>              | <b>396 (63.1)</b>                     | <b>2403</b>                           | <b>46 (1.91)</b>                                                                      |
| Asymptomatic                         | 380 (60.5)                            | 2199                                  | 36 (1.64)                                                                             |
| Symptomatic                          | 16 (2.6)                              | 204                                   | 10 (4.90)                                                                             |
| <b>Total</b>                         | <b>628</b>                            | <b>3790</b>                           | <b>89 (2.35)</b>                                                                      |

**Table 1: Breakdown of index cases of people infected with COVID-19 and quarantined people in the community based on symptom and serology status of index COVID-19 cases**

| Variables of Index Case (628)                            |              | IRR  | 95% CI    | p-value |
|----------------------------------------------------------|--------------|------|-----------|---------|
| Symptom Status*                                          | Asymptomatic | 1    | -         | -       |
|                                                          | Symptomatic  | 4.22 | 2.32-7.66 | <0.0001 |
| Serology Status**                                        | Seronegative | 1    | -         | -       |
|                                                          | Seropositive | 1.08 | 0.62-1.88 | 0.80    |
| Further adjusting for gender and age group of index case |              |      |           |         |
| Variables of Index Case                                  |              | IRR  | 95% CI    | p-value |
| Symptom Status*                                          | Asymptomatic | 1    | -         | -       |
|                                                          | Symptomatic  | 3.85 | 2.06-7.19 | <0.0001 |
| Serology Status**                                        | Seronegative | 1    | -         | -       |
|                                                          | Seropositive | 0.93 | 0.52-1.65 | 0.79    |

**Table 2: Negative binomial regression of people who are quarantined contacts who became infected, based on symptomatic and serology status of index cases. \*Symptom status analysis was adjusted for serology of people who were index cases. \*\*Serology status analysis was adjusted for symptom status of people who were index cases.**
